# Supplementary material
Source: bioRxiv or medRxiv preprint supplement (https://www.biorxiv.org/highwire/filestream/105163/field_highwire_adjunct_files/0/346635-1.pdf)
Supplement: Supplementary file [file 346635-1.pdf]

1 **Tao et al. (Supplementary Information)**

2 ***Pervasive correlation of molecular evolutionary rates in the tree of life***

3

4 **Machine learning model building**

5 **Training data.** We simulated nucleotide alignments using independent branch rate (IBR)  
6 and correlated branch rate (CBR) models using the NELSI package<sup>1</sup>. In IBR, branch-  
7 specific rates were drawn from a lognormal distribution with a mean gene rate and a  
8 standard deviation (in log-scale) that varied from 0.1 to 0.4, previously used in a study  
9 simulating independent rates with different levels of variation<sup>1</sup>. In CBR, branch-specific  
10 rates were simulated under an autocorrelated process<sup>2</sup> with an initial rate set as the mean  
11 rate derived from an empirical gene and an autocorrelated parameter,  $\nu$ , that was  
12 randomly chosen from 0.01 to 0.3, previously used in a study simulating low, moderate  
13 and high degrees of autocorrelated rates<sup>1</sup>. We used SeqGen<sup>3</sup> to generate alignments  
14 under Hasegawa-Kishino-Yano (HKY) model<sup>4</sup> with 4 discrete gamma categories by using  
15 a master phylogeny, consisting of 60-400 ingroup taxa randomly sampled from the bony-  
16 vertebrate clade in the Timetree of Life<sup>5</sup>. Mean evolutionary rates, G+C contents,  
17 transition/transversion ratios and numbers of sites for simulation were derived from  
18 empirical distributions<sup>6</sup>. These 2,000 simulated datasets were used as training data in  
19 building the machine learning model.

20 **Features acquisition.** Lineage-specific rate estimates ( $r_i$ 's) were obtained using  
21 equations [28] - [31] and [34] - [39] in Tamura et al. (2018)<sup>7</sup>. As mentioned in the main  
22 text, a lineage rate is a function of all the branch rates that belong to that lineage. For any  
23 given node in the phylogeny, we extracted the relative rates of its ancestral clade ( $r_a$ ) and  
24 two direct descendant clades ( $r_1$  and  $r_2$ ). Then, we calculated correlation between  
25 ancestral lineage and its direct descendant lineage rate to obtain estimates of ancestor-  
26 descendant rate correlation ( $\rho_{ad}$ ). We also calculated correlation between sister lineage  
27 rates ( $\rho_s$ ), for which the lineage rates of sister pairs are randomly labeled. The labeling of  
28 sister pairs have small impact on  $\rho_s$  when the number of sequences in the phylogeny is  
29 not too small (>50). However, one can also choose to resample sister pairs for multiple

30 times and use the mean of resampled  $\rho_s$  in the CorrTest in order to eliminate any bias  
31 that may result from the arbitrary designation of sister rates during the correlation process,  
32 which can be a problem when the number of taxa is small. To avoid the assumption of  
33 linear correlation between lineages, we used Spearman rank correlation because it can  
34 capture both linear and non-linear correlation between two vectors. Two additional  
35 features derived from the relative rates in the phylogeny were used in building the  
36 machine learning model. We first estimated  $\rho_{ad\_skip1}$  as the correlation between rates  
37 where the ancestor and descendant were separated by one intervening branch, and  
38  $\rho_{ad\_skip2}$  as the correlation between rates where the ancestor and descendant were  
39 separated by two intervening branches. This skipping reduces ancestor-descendant  
40 correlation, which we then used to derive the decay of correlation values by using  
41 equations  $(\rho_{ad} - \rho_{ad\_skip1})/\rho_{ad}$  and  $(\rho_{ad} - \rho_{ad\_skip2})/\rho_{ad}$ . These two features improved the  
42 accuracy of our model slightly. In the analyses of empirical datasets, we found that a large  
43 amount of missing data (>50%) can result in unreliable estimates of branch lengths and  
44 other phylogenetic errors<sup>8-12</sup>. In this case, we recommend computing selected features  
45 using only those lineage pairs for which >50% of the positions contain valid data, or  
46 remove sequences with a large amount of missing data.

47 **Predictive model.** We trained a logistic regression model using the skit-learn module<sup>13</sup>,  
48 which is a python toolbox for data mining and data analysis using machine learning  
49 algorithms, with only  $\rho_{ad}$ , only  $\rho_s$  or all 4 features ( $\rho_s$ ,  $\rho_{ad}$ , the two decay of correlation  
50 features) using 2,000 simulated training datasets (1,000 with CBR model and 1,000 with  
51 IBR model). A response value of 1 was given to true positive cases (correlated rates) and  
52 0 was assigned to true negative cases (independent rates). Thus, the prediction scores  
53 (CorrScore) were between 0 and 1. A high score representing a higher probability that  
54 the rates are correlated. Then the global thresholds at 5% and 1% significant levels can  
55 be determined. To explore the reliability of the global threshold, we re-trained the model  
56 with all 4 features extracted from 4 subsets of training data with  $\leq 100$  (M100), 100 – 200  
57 (M200), 200 – 300 (M300), and  $> 300$  (M400) sequences. A specific threshold was  
58 determined for each training subset and then was tested using Tamura *et al.* (2012)'s  
59 data<sup>14</sup> with the corresponding size. For example, we used the threshold determined by  
60 the model trained with small data ( $\leq 100$  sequences) on the test data that contain less

61 than 100 sequences, and used the threshold determined by the model trained with large  
62 data (>300 sequences) on the large test data (400 sequences). We found that the  
63 accuracy of using the specific thresholds (**Fig. S1a-c**) is similar to the accuracy when we  
64 used a global threshold (**Fig. 3d-f**). This is because the machine learning algorithm has  
65 automatically incorporated the impact of the number of sequences when it determined  
66 the relationship of four selected features ( $\rho_{ad}$ ,  $\rho_s$ , and 2 decays).

### 67 **Cross-validation**

68 We performed two cross-validation tests. In 10-fold cross-validation, the predictive model  
69 was developed using 90% of the synthetic datasets, and then its performance was tested  
70 on the remaining 10% of the datasets. The AUROC was greater than 0.99 and the  
71 accuracy was high (>94%). Even in the 2-fold cross-validation, where only half of the  
72 datasets were used for training the model and the remaining half were used for testing,  
73 the AUROC was still greater than 0.99 with an accuracy greater than 92%. This indicates  
74 that the features we used in building the machine learning model are powerful and  
75 ensures high accuracy even when the training data are limited.

### 76 **External tests**

77 **Publicly available data.** Two previously published simulated dataset were used to  
78 evaluate CorrTest's performance. Beaulieu et al.'s data<sup>15</sup> contains 91 ingroup taxa with  
79 1,000 base pairs each. For Tamura et al.'s data<sup>14</sup>, we present the test results for the data  
80 simulated using CBR model (autocorrelated lognormal distribution) and IBR model  
81 (independent uniform distribution with 50% rate variation) here. We tested the  
82 performance of our model on CBR and IBR data with different GC contents,  
83 transition/transversion ratios, and evolutionary rates. We randomly sampled 50, 100, 200,  
84 and 300 sequences from the original 400 sequences and conducted CorrTest using the  
85 correct, error-prone topology inferred by the Neighbor-joining method<sup>16</sup> with an  
86 oversimplified substitution model<sup>17</sup>. We also tested CorrTest's performance on data  
87 simulated under an IBR model process with 100% rate variation and found that CorrTest  
88 works perfectly (100% accuracy; results not shown).

89 **Synthetic data.** We conducted another set of simulations using IBR (independent  
90 lognormal distribution) and CBR (autocorrelated lognormal distribution)<sup>2</sup> model with 100

91 replicates each using the same strategy as a training data simulation (described above)  
92 on a master phylogeny of 100 taxa randomly sampled from the bony-vertebrate clade in  
93 the Timetree of Life<sup>5</sup>. These 200 datasets were used to conduct CorrTest and Bayes  
94 factor analyses and to obtain the autocorrelation parameter ( $\nu$ ) in MCMCTree<sup>18</sup>.

95

## 96 References

- 97 1. Ho, S. Y., Duchêne, S. & Duchêne, D. Simulating and detecting autocorrelation of  
98 molecular evolutionary rates among lineages. *Mol. Ecol. Resour.* **15**, 688–696  
99 (2015).  
100
- 101 2. Kishino, H., Thorne, J. L. & Bruno, W. J. Performance of a divergence time  
102 estimation method under a probabilistic model of rate evolution. *Mol. Biol. Evol.* **18**,  
103 352–361 (2001).  
104
- 105 3. Grassly, N. C., Adachi, J. & Rambaut, A. Seq-Gen: an application for the Monte  
106 Carlo simulation of protein sequence evolution along phylogenetic trees. *Comput.*  
107 *Appl. Biosci.* **13**, 235–238 (1997).  
108
- 109 4. Hasegawa, M., Kishino, H. & Yano, T. Dating of the human-ape splitting by a  
110 molecular clock of mitochondrial DNA. *J. Mol. Evol.* **22**, 160–174 (1985).  
111
- 112 5. Hedges, S. B. & Kumar, S. *The Timetree of Life*. pp3–18 (New York: Oxford  
113 University Press., 2009).  
114
- 115 6. Rosenberg, M. S. & Kumar, S. Heterogeneity of nucleotide frequencies among  
116 evolutionary lineages and phylogenetic inference. *Mol. Biol. Evol.* **20**, 610–621  
117 (2003).  
118
- 119 7. Tamura, K., Tao, Q. & Kumar, S. Theoretical foundation of the RelTime method for  
120 estimating divergence times from variable evolutionary rates. *Mol. Biol. Evol.*  
121 *msy044* (2018). doi:10.1093/molbev/msy044  
122
- 123 8. Filipowski, A., Murillo, O., Freydenzon, A., Tamura, K. & Kumar, S. Prospects for  
124 building large timetrees using molecular data with incomplete gene coverage among  
125 species. *Mol. Biol. Evol.* **31**, 2542–2550 (2014).  
126
- 127 9. Xi, Z., Liu, L. & Davis, C. C. The impact of missing data on species tree estimation.  
128 *Mol. Biol. Evol.* **33**, 838–860 (2015).  
129
- 130 10. Lemmon, A. R., Brown, J. M., Stanger-Hall, K. & Lemmon, E. M. The effect of  
131 ambiguous data on phylogenetic estimates obtained by maximum likelihood and  
132 Bayesian inference. *Syst. Biol.* **58**, 130–145 (2009).  
133

- 134 11. Wiens, J. J. & Moen, D. S. Missing data and the accuracy of Bayesian  
135 phylogenetics. *Journal of Systematics and Evolution* **46**, 307–314 (2008).  
136
- 137 12. Marin, J. & Hedges, S. B. Undersampling genomes has biased time and rate  
138 estimates throughout the tree of life. *Mol. Biol. Evol.* msy103 (2018).  
139 doi:doi.org/10.1093/molbev/msy103  
140
- 141 13. Pedregosa, F. *et al.* Scikit-learn: Machine learning in Python. *J. Mach. Learn. Res.*  
142 **12**, 2825–2830 (2011).  
143
- 144 14. Tamura, K. *et al.* Estimating divergence times in large molecular phylogenies. *Proc.*  
145 *Natl. Acad. Sci. U.S.A.* **109**, 19333–19338 (2012).  
146
- 147 15. Beaulieu, J. M., O'Meara, B. C., Crane, P. & Donoghue, M. J. Heterogeneous rates  
148 of molecular evolution and diversification could explain the Triassic age estimate for  
149 angiosperms. *Syst. Biol.* **64**, 869–878 (2015).  
150
- 151 16. Saitou, N. & Nei, M. The neighbor-joining method: a new method for reconstructing  
152 phylogenetic trees. *Mol. Biol. Evol.* **4**, 406–425 (1987).  
153
- 154 17. Kimura, M. A simple method for estimating evolutionary rates of base substitutions  
155 through comparative studies of nucleotide sequences. *J. Mol. Evol.* **16**, 111–120  
156 (1980).  
157
- 158 18. Yang, Z. PAML 4: phylogenetic analysis by maximum likelihood. *Mol. Biol. Evol.* **24**,  
159 1586–1591 (2007).

160

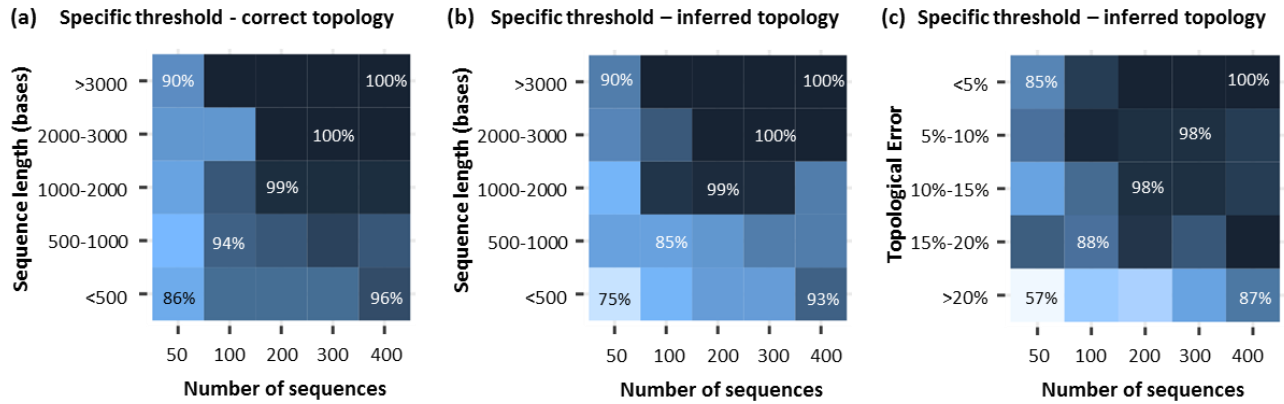

161

162

163 **Figure S1.** Patterns of CorrTest accuracy using M100, M200, M300, and M400 models  
164 for the corresponding test datasets<sup>14</sup>. Accuracies are shown for increasing number of  
165 sequences. The accuracy of CorrTest for different sequence length is shown when (a)  
166 the correct topology was assumed and (b) the topology was inferred. (c) The accuracy of  
167 CorrTest for datasets in which the inferred the topology contained small and large number  
168 of topological errors.

169

170
